# Supplementary material for: A Tailored Advice Tool to Prevent Injuries Among Novice Runners: Protocol for a Randomized Controlled Trial
Source: PubMed Central journal article supplement (PMC6315232; doi:10.2196/resprot.9708), 2018-12-19
Supplement: resprot_v7i12e187_app4.pdf [file resprot_v7i12e187_app4.pdf]

## Appendix D      Short questionnaire for runners

---

- How many times a week - on average - did you run in the past 3 months?
  - How many times a week - on average - did you exercise apart from running in the last 3 months?
  - What score would you assign to your general endurance? (How long can you continue to perform a specific effort) *Scale 1 – 10+*
  - How sensitive are you to injuries? *Scale 1 – 10+*
  - What is your main goal in running?
    - Training for a running event
    - Training to be able to run a certain distance
    - Improving endurance, fitness
    - Enjoying exercise, social interaction, exercise in a group
    - Lose weight
    - Clear my head
  - How motivated are you to reach that goal? (0 – 100%, 100% = highly motivated)
-
